# Supplementary material for: Radiation-associated circulatory disease mortality in a pooled analysis of 77,275 patients from the Massachusetts and Canadian tuberculosis fluoroscopy cohorts
Source: PubMed Central journal article supplement (PMC5347030; doi:10.1038/srep44147), 2017-03-13

**Radiation-associated circulatory disease mortality in a pooled analysis of 77,275 patients from  
the Massachusetts and Canadian tuberculosis fluoroscopy cohorts**

**Van Tran, Lydia B Zablotska, Alina V Brenner, Mark P Little**

**SUPPLEMENTARY TABLES AND FIGURES**

**Supplementary Table S1. Summary statistics of patients who were irradiated (lung dose > 0) in the Canadian and Massachusetts cohorts ( $n=11,339$  lung dose < 0.5 Gy,  $n=29,526$  lung dose unconstrained). Analysis cohort is restricted to those that contribute non-zero person-years of follow-up, after 5 year lag.**

| Variable                                | Canada |        |                 | Massachusetts           |        |                 | Total |                 |
|-----------------------------------------|--------|--------|-----------------|-------------------------|--------|-----------------|-------|-----------------|
|                                         | mean   | median | range           | Lung dose < 0.5 Gy      |        |                 | mean  | range           |
| Lung dose, Gy                           | 0.18   | 0.16   | (0.01, 0.50)    | 0.19                    | 0.14   | (0.01, 0.50)    | 0.18  | (0.01, 0.50)    |
| Dose rate, Gy/year                      | 0.59   | 0.49   | (0.00, 9.17)    | 0.68                    | 0.25   | (0.00, 4.33)    | 0.61  | (0.00, 9.17)    |
| Age at first exposure, year             | 29.44  | 27.31  | (2.56, 80.64)   | 31.39                   | 29.16  | (9.98, 69.83)   | 29.82 | (2.56, 80.64)   |
| Minimum time since last exposure, years | 3.33   | 4.25   | (-18.92, 22.17) | 5.13                    | 5.44   | (-35.03, 21.98) | 3.69  | (-35.03, 22.17) |
| Maximum time since last exposure, years | 35.59  | 38.31  | (-0.15, 57.78)  | 35.63                   | 38.92  | (-0.03, 69.65)  | 35.59 | (-0.15, 69.65)  |
| Number of fluoroscopy screenings        | 15.08  | 13.00  | (0.99, 48.00)   | 18.28                   | 13.00  | (1.00, 76.00)   | 15.71 | (0.99, 76.00)   |
| Duration of exposure, years             | 0.67   | 0.54   | (0.02, 20.91)   | 0.91                    | 0.33   | (0.00, 23.00)   | 0.72  | (0.00, 23.00)   |
|                                         |        |        |                 | Lung dose unconstrained |        |                 |       |                 |
|                                         | mean   | median | range           | mean                    | median | range           | mean  | range           |
| Lung dose, Gy                           | 1.16   | 0.81   | (0.01, 27.77)   | 0.90                    | 0.58   | (0.01, 8.56)    | 1.12  | (0.01, 27.77)   |
| Dose rate, Gy/year                      | 0.56   | 0.50   | (0.00, 9.17)    | 0.54                    | 0.34   | (0.00, 4.33)    | 0.56  | (0.00, 9.17)    |
| Age at first exposure, year             | 27.45  | 25.47  | (1.97, 80.64)   | 28.70                   | 26.56  | (4.93, 69.83)   | 27.66 | (1.97, 80.64)   |
| Minimum time since last exposure, years | 1.59   | 2.54   | (-32.25, 22.17) | 3.56                    | 4.64   | (-35.03, 21.98) | 1.92  | (-35.03, 22.17) |
| Maximum time since last exposure, years | 34.95  | 37.40  | (-5.98, 57.78)  | 37.44                   | 42.07  | (-0.03, 69.65)  | 35.36 | (-5.98, 69.65)  |
| Number of fluoroscopy screenings        | 92.70  | 65.06  | (0.99, 2041.05) | 83.00                   | 55.00  | (1.00, 833.00)  | 91.09 | (0.99, 2041.05) |
| Duration of exposure, years             | 2.60   | 1.71   | (0.02, 35.38)   | 2.68                    | 2.00   | (0.00, 25.00)   | 2.61  | (0.00, 35.38)   |

**Supplementary Table S2. Numbers of persons taking antibiotics and with diabetes in informative subset ( $n=1394$ ) of Massachusetts cohort.**

| Condition                   | Lung dose < 0.5 Gy |            | Lung dose unrestricted |            |
|-----------------------------|--------------------|------------|------------------------|------------|
|                             | number             | percentage | number                 | percentage |
| Isoniazid                   | 218                | 23.0       | 344                    | 24.7       |
| Streptomycin                | 400                | 42.2       | 542                    | 38.9       |
| Para-aminosalicylic acid    | 336                | 35.4       | 458                    | 32.9       |
| Diabetes                    | 42                 | 4.4        | 61                     | 4.4        |
| All informative individuals | 948                | 100.0      | 1394                   | 100.0      |

**Supplementary Table S3. Excess relative risk (ERR) estimates (+95% confidence intervals (CI)) for circulatory disease mortality endpoints for the full dose range in models that adjust for (a) age at first exposure, (b) time since last exposure or (c) radiation dose rate.** These adjustments are centered at the person-year weighted mean values for the full dose range data, namely 26.26 years, 23.88 years and 0.56 Gy/year. 5 year dose lag and period from entry to start of follow-up. Unless otherwise stated all CI are based on the profile likelihood.

| Sensitivity analysis                                                                      | Excess relative risk / Gy (+95% CI)  |                                                     |                                                                 |                                                                 |                                                                 |                                                                     |
|-------------------------------------------------------------------------------------------|--------------------------------------|-----------------------------------------------------|-----------------------------------------------------------------|-----------------------------------------------------------------|-----------------------------------------------------------------|---------------------------------------------------------------------|
|                                                                                           | All circulatory disease              | IHD                                                 | Cerebrovascular                                                 | Hypertensive                                                    | Heart disease apart from IHD and hypertensive                   | All other circulatory diseases apart from heart and cerebrovascular |
| Linear ERR adjusted for age at first exposure                                             | -0.026 (-0.044, -0.007)              | -0.037 (-0.062 <sup>a</sup> , -0.012 <sup>a</sup> ) | -0.017 (-0.071 <sup>a</sup> , 0.043)                            | -0.036 <sup>b</sup> (-0.160 <sup>a</sup> , 0.088 <sup>a</sup> ) | -0.010 (-0.071 <sup>a</sup> , 0.043)                            | 0.056 (-0.050 <sup>a</sup> , 0.172)                                 |
| Age at first exposure adjustment (% change in ERR / Gy per year of age at first exposure) | -4.9 (-14.6 <sup>a</sup> , 3.3)      | -5.1 (-13.4 <sup>a</sup> , 3.5)                     | -2.6 (-34.3 <sup>a</sup> , 44.5 <sup>a</sup> )                  | -4.6 <sup>b</sup> (-41.5 <sup>a</sup> , 55.5 <sup>a</sup> )     | -6.4 (-57.7 <sup>a</sup> , 107.3 <sup>a</sup> )                 | -0.4 (-16.3 <sup>a</sup> , 18.4 <sup>a</sup> )                      |
| <i>p</i> -value <sup>c</sup> for modification of ERR                                      | 0.198                                | 0.216                                               | 0.735                                                           | 0.599 <sup>b</sup>                                              | 0.843                                                           | 0.950                                                               |
| Linear ERR adjusted for time since last exposure                                          | -0.015 (-0.033, 0.001 <sup>a</sup> ) | -0.028 (-0.049 <sup>a</sup> , -0.007 <sup>a</sup> ) | -0.007 <sup>b</sup> (-0.038 <sup>a</sup> , 0.023 <sup>a</sup> ) | -0.009 <sup>b</sup> (-0.089 <sup>a</sup> , 0.070 <sup>a</sup> ) | -0.001 <sup>b</sup> (-0.014 <sup>a</sup> , 0.011 <sup>a</sup> ) | 0.051 (-0.057 <sup>a</sup> , 0.170)                                 |
| Years since last exposure adjustment (% change in ERR / Gy per year since last exposure)  | 7.5 (3.3, 11.8 <sup>a</sup> )        | 6.2 (2.7, 9.0 <sup>a</sup> )                        | 10.0 <sup>b</sup> (-3.1 <sup>a</sup> , 24.9 <sup>a</sup> )      | 9.4 <sup>b</sup> (-16.6 <sup>a</sup> , 43.6 <sup>a</sup> )      | 14.5 <sup>b</sup> (-14.9 <sup>a</sup> , 53.9 <sup>a</sup> )     | 1.4 (-13.0 <sup>a</sup> , 18.3 <sup>a</sup> )                       |
| <i>p</i> -value <sup>c</sup> for modification of ERR                                      | 0.001                                | 0.002                                               | 0.082 <sup>b</sup>                                              | 0.444 <sup>b</sup>                                              | 0.184 <sup>b</sup>                                              | 0.879                                                               |

|                                                                       |                                                     |                                               |                                                                 |                                                               |                                                    |                                                  |
|-----------------------------------------------------------------------|-----------------------------------------------------|-----------------------------------------------|-----------------------------------------------------------------|---------------------------------------------------------------|----------------------------------------------------|--------------------------------------------------|
| Linear ERR /<br>Gy adjusted for<br>dose rate                          | -0.025 (-0.043 <sup>a</sup> , -0.007 <sup>a</sup> ) | -0.037 (-0.056 <sup>a</sup> , -0.016)         | -0.014 <sup>b</sup> (-0.065 <sup>a</sup> , 0.036 <sup>a</sup> ) | -0.034 <sup>b</sup> (-0.148 <sup>a</sup> , 0.159)             | -0.017 (-0.056, 0.043 <sup>a</sup> )               | 0.058 (-0.037 <sup>a</sup> , 0.163)              |
| Dose rate<br>adjustment (%<br>change in ERR /<br>Gy per Gy /<br>year) | 69.32 (-74.59, 83.95 <sup>a</sup> )                 | 62.04 (<0 <sup>a</sup> , 72.65 <sup>a</sup> ) | 64.26 <sup>b</sup> (-66.55 <sup>a</sup> , >100 <sup>a</sup> )   | 51.33 <sup>b</sup> (-92.75 <sup>a</sup> , >100 <sup>a</sup> ) | -95.69 (-100.00 <sup>a</sup> , >100 <sup>a</sup> ) | 97.41 (-25.67 <sup>a</sup> , >100 <sup>a</sup> ) |
| <i>p</i> -value <sup>b</sup> for<br>modification of<br>ERR            | 0.179                                               | 0.078                                         | 0.525 <sup>b</sup>                                              | 0.704 <sup>b</sup>                                            | 0.370                                              | 0.418                                            |

<sup>a</sup>Wald-based CI.

<sup>b</sup>failure for the model to converge by maximum likelihood estimation

<sup>c</sup>2-sided *p*-value for departure of trend from null.

All models adjust for cohort, sub-cohort, gender, smoking status, tuberculosis status, attained age, calendar year at risk by stratification.

**Supplementary Table S4. Excess relative risk / Gy (+95% confidence intervals) for circulatory disease mortality endpoints for various sensitivity analyses.** Unless otherwise stated the dose lag (and period from entry to start of follow-up) is set to 5 years, cumulative lung dose < 0.5 Gy, and all confidence intervals are based on the profile likelihood.

| Variables                                                                                                                                                                       | All circulatory disease | IHD                                   | Cerebrovascular                      | Hypertensive                         | Heart disease apart from IHD and hypertensive | All other circulatory diseases apart from heart and cerebrovascular |
|---------------------------------------------------------------------------------------------------------------------------------------------------------------------------------|-------------------------|---------------------------------------|--------------------------------------|--------------------------------------|-----------------------------------------------|---------------------------------------------------------------------|
| 10 year dose lag, follow-up 10 years after entry                                                                                                                                |                         |                                       |                                      |                                      |                                               |                                                                     |
| Excess relative risk                                                                                                                                                            | 0.262 (0.044, 0.493)    | 0.246 (-0.025, 0.537)                 | 0.391 (-0.179, 1.054)                | 2.043 (0.194, 4.730)                 | -0.107 (-0.600, 0.477)                        | 0.515 (-0.328, 1.575)                                               |
| <i>p</i> -value <sup>a</sup>                                                                                                                                                    | 0.018                   | 0.077                                 | 0.190                                | 0.027                                | 0.700                                         | 0.253                                                               |
| Deaths                                                                                                                                                                          | 9284                    | 5872                                  | 1424                                 | 198                                  | 1158                                          | 632                                                                 |
| Lung dose unlimited                                                                                                                                                             |                         |                                       |                                      |                                      |                                               |                                                                     |
| Excess relative risk                                                                                                                                                            | -0.024 (-0.042, -0.005) | -0.037 (-0.060 <sup>b</sup> , -0.013) | -0.014 (-0.067 <sup>b</sup> , 0.044) | -0.035 (-0.152 <sup>b</sup> , 0.153) | -0.010 (-0.064 <sup>b</sup> , 0.043)          | 0.055 (-0.028, 0.164)                                               |
| <i>p</i> -value <sup>a</sup>                                                                                                                                                    | 0.014                   | 0.003                                 | 0.605                                | 0.665                                | 0.689                                         | 0.219                                                               |
| Deaths                                                                                                                                                                          | 12,983                  | 8158                                  | 1953                                 | 323                                  | 1679                                          | 870                                                                 |
| Additional adjustment for alcohol consumption, antibiotic use (as in Supplementary Table S2) and diabetes (information only available within (parts of) the Massachusetts data) |                         |                                       |                                      |                                      |                                               |                                                                     |
| Excess relative risk                                                                                                                                                            | 0.253 (0.042, 0.476)    | 0.286 (0.020, 0.572)                  | 0.435 (-0.125, 1.083)                | 1.147 (-0.333, 3.266)                | -0.240 (-0.691, 0.291)                        | 0.511 (-0.320, 1.547)                                               |
| <i>p</i> -value <sup>a, c</sup>                                                                                                                                                 | 0.018                   | 0.035                                 | 0.134                                | 0.147                                | 0.355                                         | 0.250                                                               |
| <i>p</i> -value for alcohol <sup>d</sup>                                                                                                                                        | <0.001                  | <0.001                                | 0.201                                | 0.242                                | 0.014                                         | 0.261                                                               |
| <i>p</i> -value for indicator of information on antibiotics/diabetes <sup>d</sup>                                                                                               | <0.001                  | <0.001                                | 0.012                                | 0.078                                | 0.001                                         | 0.020                                                               |
| <i>p</i> -value for diabetes <sup>d</sup>                                                                                                                                       | 0.027                   | 0.017                                 | 0.407                                | 0.569                                | 0.377                                         | 0.248                                                               |
| <i>p</i> -value for antibiotics <sup>d</sup>                                                                                                                                    | 0.807                   | 0.328                                 | 0.692                                | 0.661                                | 0.689                                         | 0.585                                                               |
| Deaths                                                                                                                                                                          | 10,209                  | 6410                                  | 1561                                 | 244                                  | 1309                                          | 685                                                                 |

<sup>a</sup>2-sided *p*-value for departure of linear dose trend from null.

<sup>b</sup>Wald-based CI.

<sup>c</sup>2-sided *p*-value for improvement in fit from adding linear trend with dose to the stratified model adjusted for alcohol use, availability of information on antibiotic use and diabetes, diabetes, and antibiotic use (Isoniazid, Streptomycin, Para-aminosalicylic acid).

<sup>d</sup>2-sided *p*-value for improvement in fit from adding successively indicators for (a) alcohol use, (b) availability of information on antibiotic use and diabetes, (c) diabetes, (d) antibiotic use (Isoniazid, Streptomycin, Para-aminosalicylic acid) to the baseline stratified model.

All models adjust by default for cohort, sub-cohort, gender, smoking status, tuberculosis status, attained age, calendar year at risk by stratification. Models in the bottom-most part of the table also adjust (by varying the background model (1) parameters  $\gamma_k$  rather than via stratification) for alcohol consumption, antibiotic use (as in Supplementary Table S2) and diabetes, with adjustment also for membership of the informative part of the Massachusetts cohort.

**Supplementary Table S5. Competing risk analysis for all circulatory disease mortality risk from the full dose range and < 0.5 Gy lung dose range. 5 year dose lag and period from entry to start of follow-up.**

|                                    | All circulatory disease | All deaths              | Deaths other than circulatory disease | All circulatory disease with all other deaths censored at date of last follow-up in each cohort |
|------------------------------------|-------------------------|-------------------------|---------------------------------------|-------------------------------------------------------------------------------------------------|
| Lung dose < 0.5 Gy                 |                         |                         |                                       |                                                                                                 |
| Excess relative risk / Gy + 95% CI | 0.246 (0.036, 0.469)    | -0.023 (-0.146, 0.104)  | -0.021 (-0.031, -0.009)               | 0.339 (0.123, 0.565)                                                                            |
| <i>p</i> -value                    | 0.021                   | 0.716                   | <0.001                                | 0.002                                                                                           |
| number of deaths                   | 10209                   | 25022                   | 14813                                 | 10209                                                                                           |
| Lung dose unrestricted             |                         |                         |                                       |                                                                                                 |
| Excess relative risk / Gy + 95% CI | -0.024 (-0.042, -0.005) | -0.185 (-0.334, -0.029) | -0.019 (-0.031, -0.005)               | -0.001 (-0.021, 0.021)                                                                          |
| <i>p</i> -value                    | 0.014                   | 0.021                   | 0.010                                 | 0.929                                                                                           |
| number of deaths                   | 12983                   | 32581                   | 19598                                 | 12983                                                                                           |

All models adjust for cohort/sub-cohort, gender, smoking status, tuberculosis status, attained age, calendar year at risk by stratification.

**Supplementary Table S6. Excess relative risk estimates for circulatory disease in the present study and various low and moderate dose studies (adapted from Little *et al.* <sup>17,48</sup>). All data are in relation to the underlying cause of death, unless otherwise indicated.**

| Data                                                       | Reference                             | Average heart/brain dose (range) (Sv) | Numbers in cohort (person years follow-up) | Endpoint (mortality unless otherwise indicated)                                         | Excess relative risk Sv <sup>-1</sup> (and 95% confidence intervals) |
|------------------------------------------------------------|---------------------------------------|---------------------------------------|--------------------------------------------|-----------------------------------------------------------------------------------------|----------------------------------------------------------------------|
| <b>Diagnostic Medical Studies</b>                          |                                       |                                       |                                            |                                                                                         |                                                                      |
| Present study                                              |                                       | 1.13 (0.01-27.77) <sup>a</sup>        | 77,274<br>(1,904,580)                      | IHD (ICD9 410–414) <0.5 Gy                                                              | 0.268 (0.003, 0.552)                                                 |
|                                                            |                                       |                                       |                                            | Hypertensive heart disease (ICD9 401–405) <0.5 Gy                                       | 1.121 (-0.351, 3.228)                                                |
|                                                            |                                       |                                       |                                            | CeVD (ICD9 430–438) <0.5 Gy                                                             | 0.441 (-0.119, 1.090)                                                |
|                                                            |                                       |                                       |                                            | All circulatory disease (ICD9 390–459) <0.5 Gy                                          | 0.246 (0.036, 0.469)                                                 |
|                                                            |                                       |                                       |                                            | IHD (ICD9 410–414) full dose range                                                      | -0.037 (-0.060, -0.013)                                              |
|                                                            |                                       |                                       |                                            | Hypertensive heart disease (ICD9 401–405) full dose range                               | -0.035 (-0.152, 0.153)                                               |
|                                                            |                                       |                                       |                                            | CeVD (ICD9 430–438) full dose range                                                     | -0.014 (-0.067, 0.044)                                               |
| All circulatory disease (ICD9 390–459) full dose range     | -0.024 (-0.042, -0.005)               |                                       |                                            |                                                                                         |                                                                      |
| Massachusetts tuberculosis fluoroscopy                     | Little <i>et al.</i> <sup>19</sup>    | 0.36 (0-8.56) <sup>a,b</sup>          | 13,572<br>(345,948)                        | IHD (ICD9 410–414) <0.5 Gy                                                              | 0.465 (-0.032, 1.034) <sup>a</sup>                                   |
|                                                            |                                       |                                       |                                            | Hypertensive heart disease (ICD9 401–405) <0.5 Gy                                       | 0.801 (-1.266, 4.638) <sup>a</sup>                                   |
|                                                            |                                       |                                       |                                            | CeVD (ICD9 430–438) <0.5 Gy                                                             | 0.343 (-0.536, 1.473) <sup>b</sup>                                   |
|                                                            |                                       |                                       |                                            | All circulatory disease (ICD9 390–459) <0.5 Gy                                          | 0.345 (-0.032, 0.764) <sup>a</sup>                                   |
|                                                            |                                       |                                       |                                            | IHD (ICD9 410–414) full dose range                                                      | -0.077 (-0.130, -0.012) <sup>a</sup>                                 |
|                                                            |                                       |                                       |                                            | Hypertensive heart disease (ICD9 401–405) full dose range                               | 0.357 (-0.043, 1.030) <sup>a</sup>                                   |
|                                                            |                                       |                                       |                                            | CeVD (ICD9 430–438) full dose range                                                     | 0.132 (-0.088, 0.415) <sup>b</sup>                                   |
| All circulatory disease (ICD9 390–459) full dose range     | -0.023 (-0.067, 0.028) <sup>a</sup>   |                                       |                                            |                                                                                         |                                                                      |
| Canadian tuberculosis fluoroscopy                          | Zablotska <i>et al.</i> <sup>18</sup> | 0.79 (0–11.60) <sup>a</sup>           | 63,707<br>(1,902,252)                      | IHD (ICD9 410–414, 429.2)                                                               | 0.007 (-0.044, 0.072) <sup>c</sup>                                   |
|                                                            |                                       |                                       |                                            | Hypertensive disease and other non-CeVD (ICD9 390–409, 415–429.1, 429.3–429.9, 439–459) | 0.027 (-0.064, 0.167) <sup>c</sup>                                   |
|                                                            |                                       |                                       |                                            | All circulatory disease apart from CeVD (ICD9 390–429, 439–459)                         | 0.020 (-0.025, 0.074) <sup>c</sup>                                   |
| <b>Therapeutic medical studies (non-malignant disease)</b> |                                       |                                       |                                            |                                                                                         |                                                                      |
| Peptic ulcer study                                         | Little <i>et al.</i> <sup>13</sup>    | 1.01 (0.0 – 6.20)                     | 3600<br>(76,571.7)                         | IHD ICD9 410-414 using heart dose                                                       | 0.102 (0.039, 0.174)                                                 |
|                                                            |                                       |                                       |                                            | IHD ICD9 410-414 using thyroid dose                                                     | 1.696 (0.651, 2.907)                                                 |
|                                                            |                                       |                                       |                                            | IHD ICD9 410-414 using kidney dose                                                      | 0.033 (0.012, 0.056)                                                 |



|                                       |                                     |                             |               |                                                                                                |                                |
|---------------------------------------|-------------------------------------|-----------------------------|---------------|------------------------------------------------------------------------------------------------|--------------------------------|
|                                       |                                     |                             |               | IHD ICD9 410-414 using pancreas dose                                                           | 0.020 (0.008, 0.035)           |
|                                       |                                     |                             |               | CeVD ICD9 430-438 using heart dose                                                             | 0.028 (-0.085, 0.186)          |
|                                       |                                     |                             |               | CeVD ICD9 430-438 using thyroid dose                                                           | 0.422 (-1.455, 3.039)          |
|                                       |                                     |                             |               | CeVD ICD9 430-438 using brain dose                                                             | 2.649 (-8.912, 18.740)         |
|                                       |                                     |                             |               | All other circulatory disease ICD9 390-409, 415-429, 439-459 using heart dose                  | 0.050 (-0.053, 0.194)          |
|                                       |                                     |                             |               | All circulatory disease ICD9 390-459 using heart dose                                          | 0.082 (0.031, 0.140)           |
| <b>Japanese atomic bomb survivors</b> |                                     |                             |               |                                                                                                |                                |
|                                       |                                     |                             |               | IHD (ICD9 410-414)                                                                             | 0.02 (-0.10, 0.15)             |
|                                       |                                     |                             |               | Myocardial infarction (ICD9 410)                                                               | 0.00 (-0.15, 0.18)             |
|                                       |                                     |                             |               | Hypertensive heart disease (ICD9 402, 404)                                                     | 0.37 (0.08, 0.72)              |
|                                       |                                     |                             |               | Rheumatic heart disease (ICD9 393-398)                                                         | 0.86 (0.25, 1.72)              |
|                                       |                                     |                             |               | Heart failure (ICD9 428)                                                                       | 0.22 (0.07, 0.39)              |
|                                       |                                     |                             |               | Other heart disease (ICD9 390-392, 415-427, 429)                                               | -0.01 (-0.21, 0.24)            |
|                                       |                                     |                             |               | Hypertensive disease without heart disease (ICD9 401, 403, 405)                                | 0.07 (-0.22, 0.55)             |
|                                       |                                     |                             |               | Heart disease total (ICD9 393-429 excluding 401, 403, 405)                                     | 0.18 (0.11, 0.25) <sup>e</sup> |
| Mortality                             | Shimizu <i>et al.</i> <sup>22</sup> | 0.1 (0 - 4) <sup>d</sup>    | 86,611 (n.a.) | Cerebral infarction (ICD9 433,434)                                                             | 0.04 (-0.10, 0.20)             |
|                                       |                                     |                             |               | Cerebral hemorrhage (ICD9 431)                                                                 | 0.05 (-0.06, 0.17)             |
|                                       |                                     |                             |               | Subarachnoid hemorrhage (ICD9 430)                                                             | 0.30 (-0.04, 0.76)             |
|                                       |                                     |                             |               | Other or unspecified cerebrovascular disease                                                   | 0.16 (0.01, 0.34)              |
|                                       |                                     |                             |               | CeVD total (ICD9 430-438)                                                                      | 0.12 (0.05, 0.19) <sup>e</sup> |
|                                       |                                     |                             |               | Circulatory disease apart from heart disease and stroke (ICD9 390-392, 401, 403, 405, 439-459) | 0.58 (0.45, 0.72) <sup>e</sup> |
|                                       |                                     |                             |               | Other circulatory disease (ICD9 399-400, 406-409, 439-459)                                     | -0.01 (<-0.01, 0.34)           |
|                                       |                                     |                             |               | All circulatory disease (ICD9 390-459)                                                         | 0.15 (0.10, 0.20) <sup>e</sup> |
|                                       |                                     |                             |               | Hypertension incidence, 1958-1998 (ICD9 401)                                                   | 0.05 (-0.01, 0.10)             |
|                                       |                                     |                             |               | Hypertensive heart disease incidence, 1958-1998 (ICD9 402, 404)                                | -0.01 (-0.09, 0.09)            |
|                                       |                                     |                             |               | IHD incidence, 1958-1998 (ICD9 410-414)                                                        | 0.05 (-0.05, 0.16)             |
| Morbidity                             | Yamada <i>et al.</i> <sup>21</sup>  | 0.1 (0 - 4) <sup>e, f</sup> | 10,339 (n.a.) | Myocardial infarction incidence, 1964-1998 (ICD9 410)                                          | 0.12 (-0.16, 0.60)             |
|                                       |                                     |                             |               | Occlusion incidence, 1958-1998 (ICD9 433, 434)                                                 | 0.06 (-0.11, 0.30)             |
|                                       |                                     |                             |               | Aortic aneurysm incidence, 1958-1998 (ICD9 441, 442)                                           | 0.02 (-0.22, 0.41)             |
|                                       |                                     |                             |               | Stroke incidence, 1958-1998 (ICD9 430, 431, 433, 434, 436)                                     | 0.07 (-0.08, 0.24)             |

|                             |                                       |                                       |                     |                                                                                     |                                    |
|-----------------------------|---------------------------------------|---------------------------------------|---------------------|-------------------------------------------------------------------------------------|------------------------------------|
| Morbidity <i>in utero</i>   | Tatsukawa <i>et al.</i> <sup>49</sup> | 0.001 (0-1.79)                        | 506 (9,265)         | Hypertension                                                                        | 0.20 (-0.39, 1.38)                 |
|                             |                                       |                                       |                     | Non-fatal stroke or myocardial infarction                                           | -0.91 (-1.00, 79.3)                |
| Morbidity in childhood      | Tatsukawa <i>et al.</i> <sup>49</sup> | 0.13 (0-3.53)                         | 1,053 (20,216)      | Hypertension                                                                        | 0.15 (-0.01, 0.34)                 |
|                             |                                       |                                       |                     | Non-fatal stroke or myocardial infarction                                           | 0.72 (0.24, 1.40)                  |
| <b>Occupational studies</b> |                                       |                                       |                     |                                                                                     |                                    |
|                             |                                       |                                       | 22,377<br>(447,281) | IHD morbidity (ICD9 410-414)                                                        | 0.14 (0.08, 0.21) <sup>h</sup>     |
|                             |                                       |                                       |                     | IHD morbidity (ICD9 410-414)                                                        | 0.14 (0.08, 0.21) <sup>c</sup>     |
|                             |                                       |                                       |                     | IHD morbidity (ICD9 410-414)                                                        | 0.16 (0.10, 0.24) <sup>i</sup>     |
|                             |                                       |                                       | 22,377<br>(836,048) | IHD mortality (ICD9 410-414)                                                        | 0.05 (-0.01, 0.13) <sup>h</sup>    |
|                             |                                       |                                       |                     | IHD mortality (ICD9 410-414)                                                        | 0.05 (-0.01, 0.13) <sup>c</sup>    |
|                             |                                       |                                       |                     | IHD mortality (ICD9 410-414)                                                        | 0.05 (-0.01, 0.13) <sup>i</sup>    |
| Mayak workers               | Moseeva <i>et al.</i> <sup>50</sup>   | 0.62 ± 0.80 (males) <sup>g</sup>      | 18,856<br>(341,663) | CeVD morbidity (ICD9 430-438)                                                       | 0.497 (0.393, 0.601) <sup>h</sup>  |
|                             | Azizova <i>et al.</i> <sup>51</sup>   | 0.51 ± 0.68<br>(females) <sup>d</sup> |                     | CeVD morbidity (ICD9 430-438)                                                       | 0.529 (0.415, 0.642) <sup>c</sup>  |
|                             |                                       |                                       |                     | CeVD morbidity (ICD9 430-438)                                                       | 0.572 (0.450, 0.695) <sup>i</sup>  |
|                             |                                       |                                       | 18,856<br>(272,525) | CeVD mortality (ICD9 430-438)                                                       | 0.057 (-0.046, 0.161) <sup>h</sup> |
|                             |                                       |                                       |                     | CeVD mortality (ICD9 430-438)                                                       | 0.064 (-0.042, 0.170) <sup>c</sup> |
|                             |                                       |                                       |                     | CeVD mortality (ICD9 430-438)                                                       | 0.076 (-0.033, 0.186) <sup>i</sup> |
|                             |                                       |                                       |                     | Hypertension (ICD10 I10-I15) morbidity                                              | 0.26 (-0.04, 0.56)                 |
|                             |                                       |                                       |                     | Essential hypertension (ICD10 I10) morbidity                                        | 0.36 (0.005, 0.71)                 |
|                             |                                       |                                       |                     | Hypertensive heart disease (ICD10 I11) morbidity                                    | 0.04 (-0.36, 0.44)                 |
|                             |                                       |                                       |                     | IHD (ICD10 I20-I25) morbidity                                                       | 0.41 (0.05, 0.78)                  |
|                             |                                       |                                       |                     | Acute myocardial infarction (ICD10 I21) morbidity                                   | 0.19 (-0.99, 1.37)                 |
|                             |                                       |                                       |                     | Other acute IHD (ICD10 I24) morbidity                                               | 0.82 (-0.62, 2.26)                 |
|                             |                                       |                                       |                     | Angina pectoris (ICD10 I20) morbidity                                               | 0.26 (-0.19, 0.71)                 |
| Chernobyl emergency workers | Ivanov <i>et al.</i> <sup>52</sup>    | 0.109 (0 - >0.5)                      | 61,017 (n.a.)       | Chronic IHD (ICD10 I25) morbidity                                                   | 0.20 (-0.23, 0.63)                 |
|                             |                                       |                                       |                     | Other heart disease (ICD10 I30-I52) morbidity                                       | -0.26 (-0.81, 0.28)                |
|                             |                                       |                                       |                     | CeVD (ICD10 I60-I69) morbidity                                                      | 0.45 (0.11, 0.80)                  |
|                             |                                       |                                       |                     | Morbidity from diseases of arteries, arterioles and capillaries (ICD10 I70-I79)     | 0.47 (-0.15, 1.09)                 |
|                             |                                       |                                       |                     | Morbidity from diseases of veins, lymphatic vessels and lymph nodes (ICD10 I80-I89) | -0.26 (-0.70, 0.18)                |
|                             |                                       |                                       |                     | All circulatory disease (ICD10 I00-I99) morbidity                                   | 0.18 (-0.03, 0.39)                 |

|                                                                        |                                         |                                |                                  |                                                                                      |                                      |
|------------------------------------------------------------------------|-----------------------------------------|--------------------------------|----------------------------------|--------------------------------------------------------------------------------------|--------------------------------------|
| Chernobyl emergency workers                                            | Kaschchev <i>et al.</i> <sup>53</sup>   | 0.161 (0.0001 - 1.24)          | 53,772 (958,540.5)               | CeVD (ICD10 I60-I69) morbidity after no diabetes                                     | 0.35 (0.18, 0.53)                    |
|                                                                        |                                         |                                |                                  | CeVD (ICD10 I60-I69) morbidity after diabetes                                        | 1.29 (0.63, 1.94)                    |
|                                                                        |                                         |                                |                                  | CeVD (ICD10 I60-I69) morbidity after no atherosclerosis                              | 0.43 (0.25, 0.62)                    |
|                                                                        |                                         |                                |                                  | CeVD (ICD10 I60-I69) morbidity after atherosclerosis                                 | 0.50 (0.09, 0.90)                    |
|                                                                        |                                         |                                |                                  | CeVD (ICD10 I60-I69) morbidity after no hypertensive disease                         | 0.38 (0.08, 0.68)                    |
|                                                                        |                                         |                                |                                  | CeVD (ICD10 I60-I69) morbidity after hypertensive disease                            | 0.48 (0.27, 0.68)                    |
|                                                                        |                                         |                                |                                  | CeVD (ICD10 I60-I69) morbidity after no IHD                                          | 0.41 (0.14, 0.68)                    |
|                                                                        |                                         |                                |                                  | CeVD (ICD10 I60-I69) morbidity after IHD                                             | 0.47 (0.25, 0.69)                    |
|                                                                        |                                         |                                |                                  | CeVD (ICD10 I60-I69) morbidity after no concomitant disease                          | 0.19 (-0.99, 1.37)                   |
|                                                                        |                                         |                                |                                  | CeVD (ICD10 I60-I69) morbidity                                                       | 0.45 (0.28, 0.62)                    |
| German uranium miner study                                             | Kreuzer <i>et al.</i> <sup>54</sup>     | 0.041 (0 - 0.909) <sup>j</sup> | 58,982 (2,180,639)               | All circulatory disease (ICD10 I00-I99)                                              | -0.13 (-0.38, 0.12)                  |
| EdF workers                                                            | Laurent <i>et al.</i> <sup>55</sup>     | 0.0215 (0 - 0.6)               | 22,393 (440,984)                 | IHD                                                                                  | 4.1 (-2.9, 13.7) <sup>k</sup>        |
|                                                                        |                                         |                                |                                  | CeVD                                                                                 | 17.4 (0.2, 43.9) <sup>k</sup>        |
|                                                                        |                                         |                                |                                  | All circulatory disease                                                              | 2.7 (-2.3, 9.1) <sup>k</sup>         |
| Eldorado uranium miners and processing (male) workers                  | Lane <i>et al.</i> <sup>56</sup>        | 0.0522 (<0.0234 - >0.1215)     | 16,236 (508,673)                 | IHD                                                                                  | 0.15 (-0.14, 0.58)                   |
|                                                                        |                                         |                                |                                  | Stroke                                                                               | -0.29 (<-0.29, 0.27)                 |
|                                                                        |                                         |                                |                                  | All other circulatory disease                                                        | 0.07 (<-0.33, 0.77)                  |
| BNFL workers                                                           | McGeoghegan <i>et al.</i> <sup>25</sup> | 0.0569 (0 - >0.729)            | 38,779 (1,081,570)               | IHD (ICD9 410-414)                                                                   | 0.70 (0.37, 1.07) <sup>e, i, k</sup> |
|                                                                        |                                         |                                |                                  | CeVD (ICD9 430-438)                                                                  | 0.66 (0.17, 1.27) <sup>e, i, k</sup> |
|                                                                        |                                         |                                |                                  | Other circulatory diseases (ICD9 390-398, 415-429, 440-459)                          | 0.83 (-0.10, 1.12) <sup>i, k</sup>   |
|                                                                        |                                         |                                |                                  | Circulatory diseases apart from CeVD (ICD9 390-429, 439-459)                         | 0.72 (0.39, 1.10) <sup>i, k</sup>    |
|                                                                        |                                         |                                |                                  | All circulatory disease (ICD9 390-459)                                               | 0.54 (0.30, 0.82) <sup>e, i, k</sup> |
| 3 <sup>rd</sup> Analysis of UK National Registry for Radiation Workers | Muirhead <i>et al.</i> <sup>57</sup>    | 0.0249 (<0.01 - >0.4)          | 174,541 (3.9 x 10 <sup>6</sup> ) | All circulatory disease (ICD9 390-459)                                               | 0.251 (-0.01, 0.54)                  |
|                                                                        |                                         |                                |                                  | Circulatory disease not strongly related to smoking (ICD9 390-409, 415-440, 442-459) | 0.280 (-0.19, 0.85)                  |
|                                                                        |                                         |                                |                                  | Aortic aneurysm (ICD9 441)                                                           | -0.132 (-1.29, 1.92)                 |
|                                                                        |                                         |                                |                                  | IHD (ICD9 410-414)                                                                   | 0.259 (-0.05, 0.61)                  |
|                                                                        |                                         |                                |                                  | CeVD (ICD9 430-438)                                                                  | 0.161 (-0.42, 0.91)                  |

|                                       |                                        |                             |                        |                                                                                                     |                                    |
|---------------------------------------|----------------------------------------|-----------------------------|------------------------|-----------------------------------------------------------------------------------------------------|------------------------------------|
| US Oak Ridge workers                  | Richardson and Wing <sup>58</sup>      | n.a. (0 - >0.1)             | 14,095<br>(425,486)    | IHD (ICD8 410-414)                                                                                  | -2.86 (-6.90, 1.18)                |
| IARC 15- country nuclear worker study | Vrijheid <i>et al.</i> <sup>59</sup>   | 0.0207 (0.0 - >0.5)         | 275,312<br>(4,067,861) | Circulatory disease (ICD10 I00-I99, J60-J69, O88.2, R00-R02, R57)                                   | 0.09 (-0.43, 0.70)                 |
|                                       |                                        |                             |                        | IHD (ICD10 I20-I25)                                                                                 | -0.01 (-0.59, 0.69)                |
|                                       |                                        |                             |                        | Heart failure (ICD10 I50)                                                                           | -0.03 (<0, 4.91)                   |
|                                       |                                        |                             |                        | Deep vein thrombosis and pulmonary embolism (ICD10 I26, I80, I82, O88.2)                            | -0.95 (-1.00, 9.09) <sup>l</sup>   |
|                                       |                                        |                             |                        | CeVD (ICD10 I60-I69)                                                                                | 0.88 (-0.67, 3.16)                 |
|                                       |                                        |                             |                        | All other circulatory disease (ICD10 R00-R02, R57, I00-I99 excluding I20-26, I50, I60-69, I80, I82) | 0.29 (<0, 2.40)                    |
| <b>Environmental studies</b>          |                                        |                             |                        |                                                                                                     |                                    |
| Three Mile Island study               | Talbot <i>et al.</i> <sup>60</sup>     | 0.0001 (0- >0.00016)        | 32,135<br>(561,063)    | Heart disease (white males)                                                                         | -274 (-874, 438)                   |
|                                       |                                        |                             |                        | Heart disease (white females)                                                                       | -951 (-1433, -390)                 |
| Techa River study                     | Krestinina <i>et al.</i> <sup>61</sup> | 0.035 (0-0.51) <sup>m</sup> | 29,735<br>(901,563)    | All circulatory disease mortality (ICD9 390-459)                                                    | 0.18 (-0.13, 0.52) <sup>m, h</sup> |
|                                       |                                        |                             |                        | All circulatory disease mortality (ICD9 390-459)                                                    | 0.24 (-0.08, 0.59) <sup>m, c</sup> |
|                                       |                                        |                             |                        | All circulatory disease mortality (ICD9 390-459)                                                    | 0.36 (0.02, 0.75) <sup>m, i</sup>  |
|                                       |                                        |                             |                        | IHD mortality (ICD9 410-414)                                                                        | 0.26 (-0.22, 0.81) <sup>m, h</sup> |
|                                       |                                        |                             |                        | IHD mortality (ICD9 410-414)                                                                        | 0.40 (-0.11, 0.99) <sup>m, c</sup> |
|                                       |                                        |                             |                        | IHD mortality (ICD9 410-414)                                                                        | 0.56 (0.01, 1.19) <sup>m, i</sup>  |
| Semipalatinsk nuclear test study      | Grosche <i>et al.</i> <sup>62</sup>    | 0.09 (0-0.63) <sup>j</sup>  | 19,545<br>(582,656)    | Heart disease (ICD9 410-429): all settlements                                                       | 3.22 (2.33, 4.10) <sup>c</sup>     |
|                                       |                                        |                             |                        | Heart disease (ICD9 410-429): exposed settlements                                                   | 0.06 (-0.39, 0.52) <sup>c</sup>    |
|                                       |                                        |                             |                        | Stroke (ICD9 430-438): all settlements                                                              | 2.96 (1.77, 4.14) <sup>c</sup>     |
|                                       |                                        |                             |                        | Stroke (ICD9 430-438): exposed settlements                                                          | -0.06 (-0.65, 0.54) <sup>c</sup>   |
|                                       |                                        |                             |                        | Cardiovascular disease (ICD9 390-459): all settlements                                              | 3.15 (2.48, 3.81) <sup>c</sup>     |
|                                       |                                        |                             |                        | Cardiovascular disease (ICD9 390-459): exposed settlements                                          | 0.02 (-0.32, 0.37) <sup>c</sup>    |

<sup>a</sup>analysis based on lung dose

<sup>b</sup>analysis based on thyroid dose

<sup>c</sup>assuming a lag period of 10 years.

<sup>d</sup>analysis based on colon dose.

<sup>e</sup>analysis using underlying or contributing cause of death.

<sup>f</sup>analysis based on stomach dose, derived from Table 4 of Yamada *et al.*<sup>21</sup> with smoking and drinking in the stratification.

<sup>g</sup>Risk estimates in relation to cumulative whole body external gamma dose; doses given here are from Moseeva *et al.*<sup>50</sup>.

<sup>h</sup>Assuming a lag period of 5 years.

<sup>i</sup>Assuming a lag period of 15 years.

<sup>j</sup>risk estimates in relation to cumulative whole body external gamma dose.

<sup>k</sup>90% CI.

<sup>l</sup>estimate derived from log-linear model, evaluated at 1 Sv.

<sup>m</sup>analysis based on dose to muscle.

**Supplementary Figure S1. Kaplan-Meier plots by lung dose category and endpoint (<0.05, 0.05-0.19, 0.20-0.29, 0.30-0.49 Gy).**

All circulatory disease

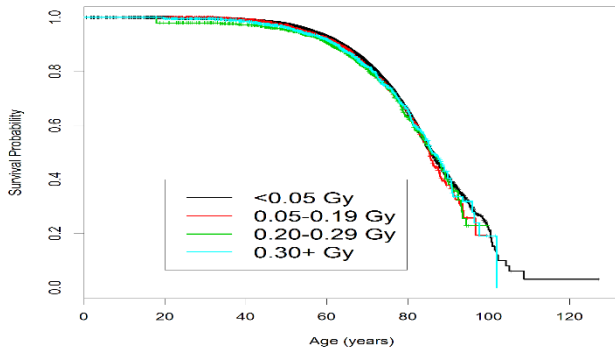

Ischaemic heart disease

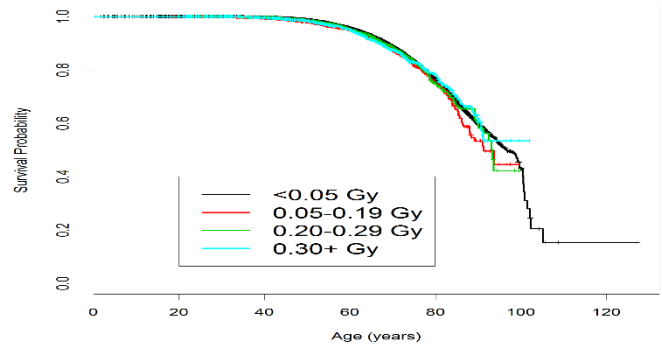

Cerebrovascular disease

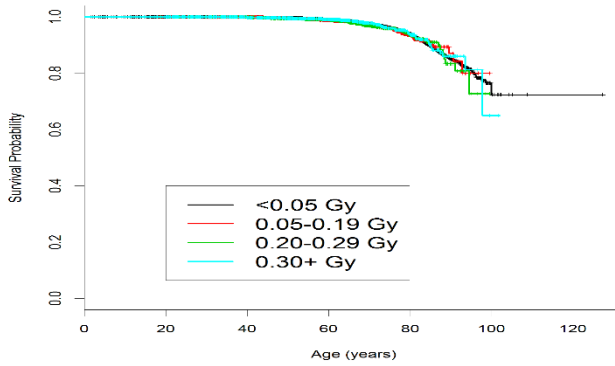

Hypertensive disease

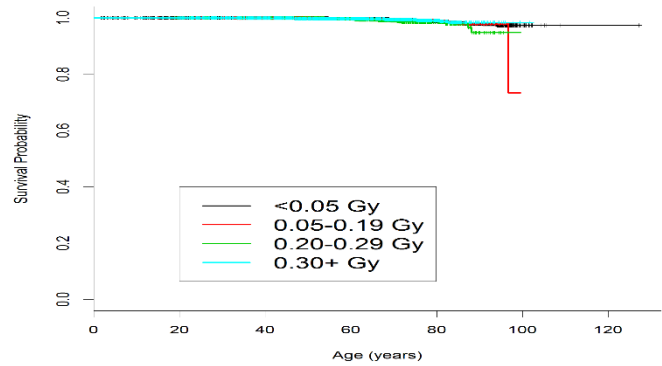

Heart disease other than ischaemic heart disease and hypertensive disease

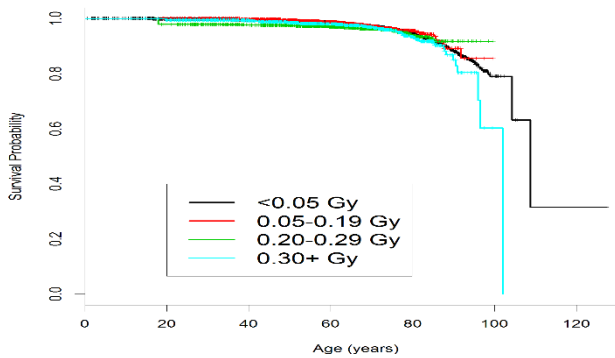

Circulatory disease apart from heart and cerebrovascular disease

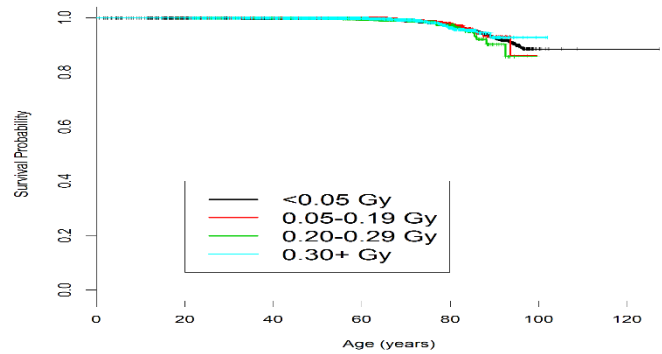

**Supplementary Figure S2. Relative risk estimates (and their 95% confidence intervals) against cumulative lagged dose (lagged by 5 years) for the unrestricted dose range.** Relative risk estimates are given for cumulative lagged dose categories (0-0.049, 0.050-0.099, 0.100-0.149, 0.150-0.199, 0.200-0.299, 0.300-0.499, 0.500-0.749, 0.750-0.999, 1.000-1.499, 1.500-1.999, 2.000-2.499, 2.500-2.999, 3.000-3.999, 4.000-4.999, 5.000-5.999,  $\geq 6.000$  Gy). The dashed red line corresponds to relative risk = 1.

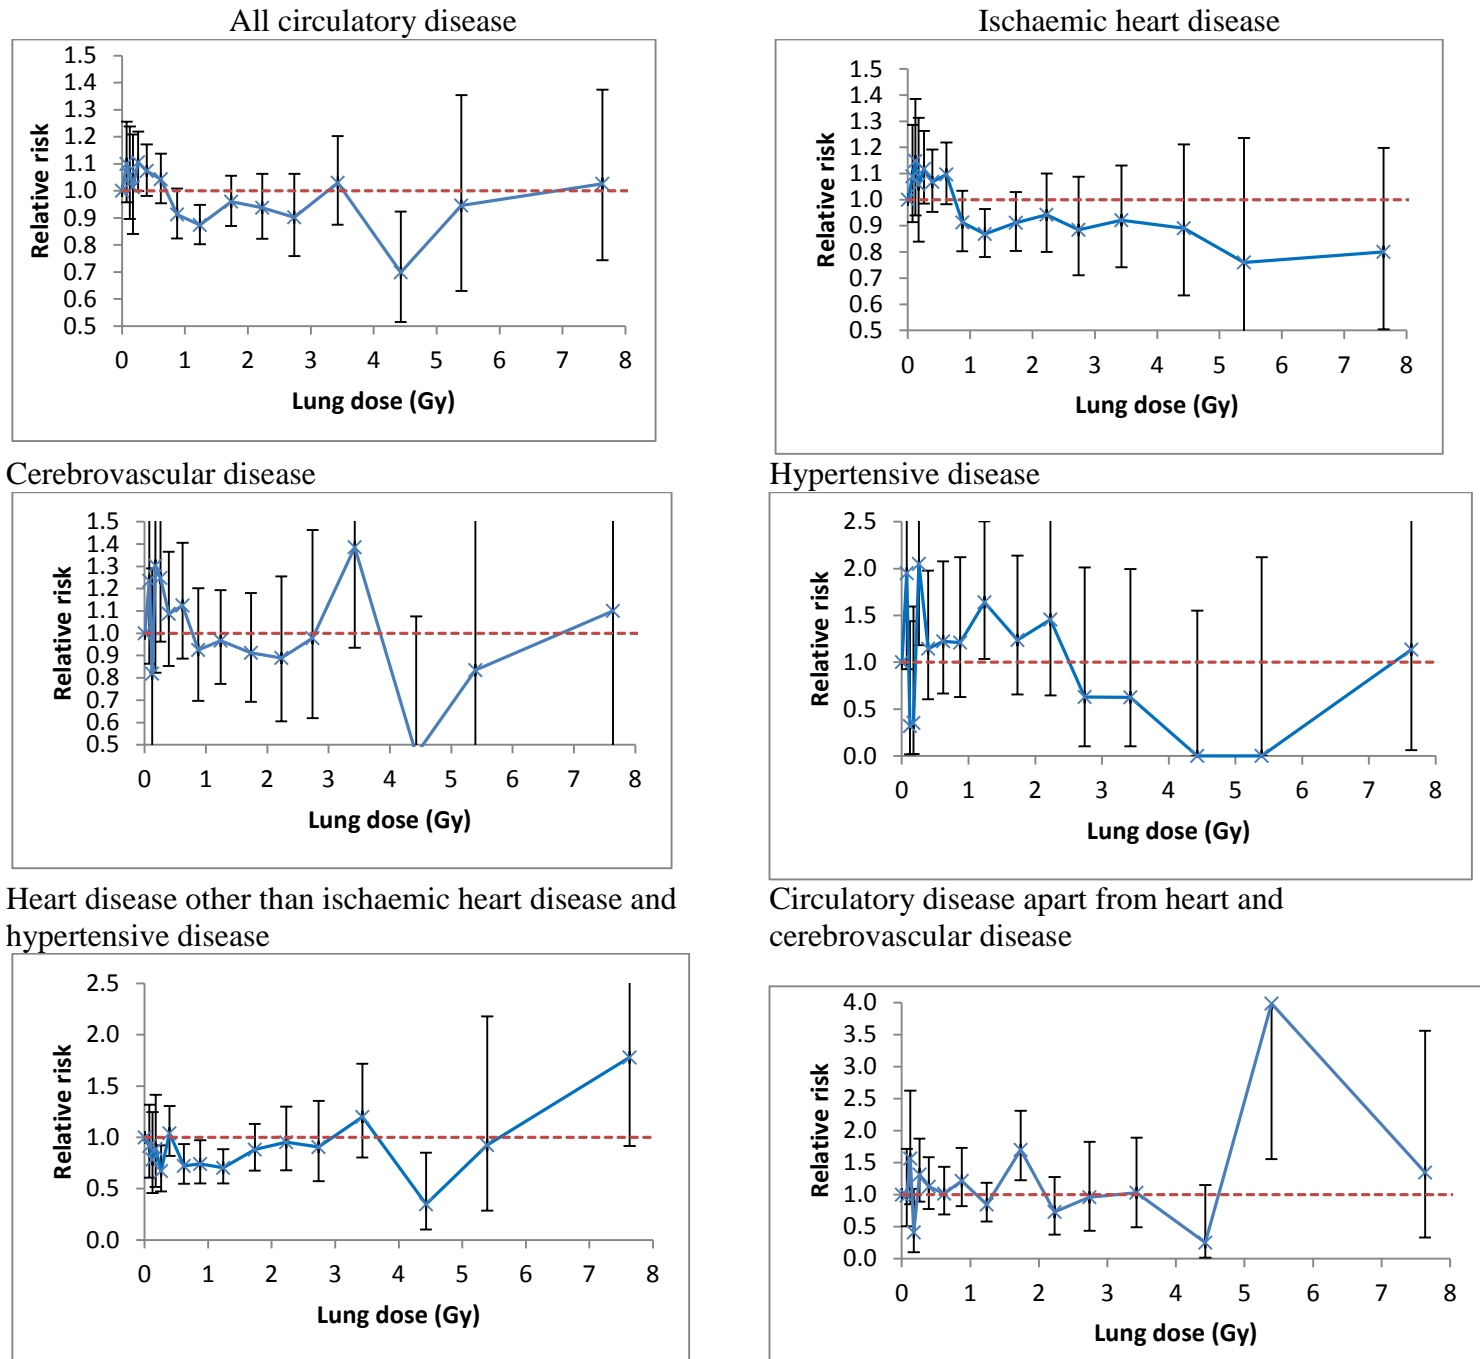

Supplement: srep44147-s1.pdf [file srep44147-s1.pdf]
